# Supplementary material
Source: PubMed Central journal article supplement (PMC3125946)
Supplement: NIHMS295671-supplement-1_si_001.pdf [file NIHMS295671-supplement-1_si_001.pdf]

## SUPPLEMENTAL INFORMATION

### Structure and Mutational Analysis of the Archaeal GTP:AdoCbi-P Guanylyltransferase (CobY) from *Methanocaldococcus jannaschii*: Insights into GTP Binding and Dimerization.

Sean A. Newmister<sup>1§</sup>, Michele M. Otte<sup>2§</sup>, Jorge C. Escalante-Semerena<sup>2</sup>, and Ivan Rayment<sup>1\*</sup>

From the Departments of Biochemistry<sup>1</sup> and Bacteriology<sup>2</sup> of the University of Wisconsin, Madison, WI 53706

\*Corresponding author: 433 Babcock Drive, Madison WI 53706; Telephone: 608-262-0437; Fax: 608-262-1319;

E-mail: [ivan\\_rayment@biochem.wisc.edu](mailto:ivan_rayment@biochem.wisc.edu)

§Contributed equally to the work

Running title: Structure and mutational analysis of an archaeal GTP:AdoCbi-P guanylyltransferase

**Table S1. List of strains and plasmids used in these studies.**

| Strain or plasmid                       | Genotype                                                                                                                                                                                               | Reference or source <sup>2</sup> |
|-----------------------------------------|--------------------------------------------------------------------------------------------------------------------------------------------------------------------------------------------------------|----------------------------------|
| <i>Salmonella enterica</i> <sup>1</sup> |                                                                                                                                                                                                        |                                  |
| TR6583; formerly SA2929                 | <i>metE205 ara-9</i>                                                                                                                                                                                   | K. Sanderson via J. Roth         |
| <b>Derivatives of TR6583</b>            |                                                                                                                                                                                                        |                                  |
| JE8268                                  | $\Delta cob1315 \Delta ycfN112^3$                                                                                                                                                                      | (1)                              |
| <b>Derivatives of JE8268</b>            |                                                                                                                                                                                                        |                                  |
| JE8269                                  | / pT7-7                                                                                                                                                                                                | (2)                              |
| JE8335                                  | / pCOBY14                                                                                                                                                                                              | (2, 3)                           |
| JE9293                                  | / pCOBY42                                                                                                                                                                                              |                                  |
| JE9294                                  | / pCOBY43                                                                                                                                                                                              |                                  |
| JE9299                                  | / pCOBY44                                                                                                                                                                                              |                                  |
| JE9305                                  | / pCOBY45                                                                                                                                                                                              |                                  |
| JE9306                                  | / pCOBY39                                                                                                                                                                                              |                                  |
| JE10882                                 | / pCOBY48                                                                                                                                                                                              |                                  |
| JE10883                                 | / pCOBY49                                                                                                                                                                                              |                                  |
| JE10884                                 | / pCOBY50                                                                                                                                                                                              |                                  |
| JE10885                                 | / pCOBY51                                                                                                                                                                                              |                                  |
| JE10886                                 | / pCOBY52                                                                                                                                                                                              |                                  |
| JE10887                                 | / pCOBY53                                                                                                                                                                                              |                                  |
| JE12119                                 | / pCOBY57                                                                                                                                                                                              |                                  |
| JE12120                                 | / pCOBY58                                                                                                                                                                                              |                                  |
| JE12121                                 | / pCOBY59                                                                                                                                                                                              |                                  |
| JE12503                                 | / pCOBY56                                                                                                                                                                                              |                                  |
| JE12504                                 | / pCOBY60                                                                                                                                                                                              |                                  |
| <i>Escherichia coli</i>                 |                                                                                                                                                                                                        |                                  |
| BL21-CodonPlus® (DE3)-RIL               | B F <sup>-</sup> <i>ompT hsdS</i> (r <sub>B</sub> <sup>-</sup> , m <sub>B</sub> <sup>-</sup> ) <i>dcm</i> <sup>+</sup> <i>tet gal</i> $\lambda$ (DE3)<br><i>endA Hte</i> ( <i>argU ileY leuW cat</i> ) | Stratagene                       |
| <b>Plasmids</b>                         |                                                                                                                                                                                                        |                                  |
| pT7-7                                   | <i>bla</i> <sup>+</sup> ; cloning vector                                                                                                                                                               | Derivative of pT7-1 (4)          |
| <b>Derivatives of pT7-7</b>             |                                                                                                                                                                                                        |                                  |
| pCOBY14                                 | <i>M. jannaschii cobY</i> <sup>+</sup> in pT7-7 <i>bla</i> <sup>+</sup>                                                                                                                                | (5)                              |
| pCOBY39                                 | <i>M. jannaschii cobY1</i> , encodes CobY <sup>G153D</sup>                                                                                                                                             |                                  |

| Derivatives of pCOBY14 |                                                                          |  |
|------------------------|--------------------------------------------------------------------------|--|
| pCOBY42                | <i>M. jannaschii</i> <i>cobY2</i> , encodes CobY <sup>G8D</sup>          |  |
| pCOBY43                | <i>M. jannaschii</i> <i>cobY3</i> , encodes CobY <sup>P20A</sup>         |  |
| pCOBY44                | <i>M. jannaschii</i> <i>cobY4</i> , encodes CobY <sup>N177R</sup>        |  |
| pCOBY45                | <i>M. jannaschii</i> <i>cobY5</i> , encodes CobY <sup>P94A</sup>         |  |
| pCOBY48                | <i>M. jannaschii</i> <i>cobY6</i> , encodes CobY <sup>P54A</sup>         |  |
| pCOBY49                | <i>M. jannaschii</i> <i>cobY7</i> , encodes CobY <sup>D101G</sup>        |  |
| pCOBY50                | <i>M. jannaschii</i> <i>cobY8</i> , encodes CobY <sup>E18D</sup>         |  |
| pCOBY51                | <i>M. jannaschii</i> <i>cobY9</i> , encodes CobY <sup>T53S</sup>         |  |
| pCOBY52                | <i>M. jannaschii</i> <i>cobY10</i> , encodes CobY <sup>Y80F</sup>        |  |
| pCOBY53                | <i>M. jannaschii</i> <i>cobY11</i> , encodes CobY <sup>D83G</sup>        |  |
| pCOBY56                | <i>M. jannaschii</i> <i>cobY12</i> , encodes CobY <sup>S50A</sup>        |  |
| pCOBY57                | <i>M. jannaschii</i> <i>cobY13</i> , encodes CobY <sup>T56A</sup>        |  |
| pCOBY58                | <i>M. jannaschii</i> <i>cobY14</i> , encodes CobY <sup>S100A</sup>       |  |
| pCOBY59                | <i>M. jannaschii</i> <i>cobY1395</i> , encodes CobY <sup>T180A</sup>     |  |
| pCOBY60                | <i>M. jannaschii</i> <i>cobY15</i> , encodes CobY <sup>N179D</sup>       |  |
| pCOBY61                | <i>M. jannaschii</i> <i>cobY16</i> , encodes CobY <sup>L38K K41D</sup>   |  |
| pCOBY62                | <i>M. jannaschii</i> <i>cobY17</i> , encodes CobY <sup>L38K L41D</sup>   |  |
| pCOBY63                | <i>M. jannaschii</i> <i>cobY18</i> , encodes CobY <sup>I144D F146D</sup> |  |

<sup>1</sup>All strains are derivatives of *S. enterica* serovar Typhimurium strain LT2 and carry a null allele of the *metE* gene, which encodes the Cbl-independent methionine synthase (MetE) enzyme. In the absence of Cbl, *metE* mutants are methionine auxotrophs. When Cbl is available, *metE* mutants use the Cbl-dependent methionine synthase (MetH) enzyme to methylate homocysteine to methionine (6).

<sup>2</sup>Strains were constructed for this study unless otherwise indicated.

<sup>3</sup>In the text, this strain is referred to as  $\Delta cobU \Delta ycfN$ .

**Table S2. List of primers used for site-directed mutagenesis.**

| Plasmid | Amino Acid Change | Forward Primer Sequence                                                        | Reverse Primer Sequence                                                        |
|---------|-------------------|--------------------------------------------------------------------------------|--------------------------------------------------------------------------------|
| pCOBY42 | G8D               | 5'- GGA TGC TCT AAT TAT GGC TGA TGG TAA AGG AAC AAG AAT GGG TGG AG -3'         | 5'- CTC CAC CCA TTC TTG TTC CTT TAC CAT CAG CCA TAA TTA GAG CAT CC -3'         |
| pCOBY50 | E18D              | 5'- CAA GAA TGG GTG GAG TTG ATA AGC CGT TGA TTA AGC -3'                        | 5'- GCT TAA TCA ACG GCT TAT CAA CTC CAC CCA TTC TTG -3'                        |
| pCOBY43 | P20A              | 5'- GGG TGG AGT TGA AAA GGC GTT GAT TAA GCT TTG TGG -3'                        | 5'- CCA CAA AGC TTA ATC AAC GCC TTT TCA ACT CCA CCC -3'                        |
| pCOBY56 | S50A              | 5'- GTA AAT AAT ATA TTT ATC GCT ACC GCT CCA AAT ACA CCA AAG -3'                | 5'- CTT TGG TGT ATT TGG AGC GGT AGC GAT AAA TAT ATT ATT TAC -3'                |
| pCOBY51 | T53S              | 5'- CGC TAC CTC TCC AAA TTC ACC AAA GAC AAA GG -3'                             | 5'- CCT TTG TCT TTG GTG AAT TTG GAG AGG TAG CG -3'                             |
| pCOBY48 | P54A              | 5'- CGC TAC CTC TCC AAA TAC AGC GAA GAC AAA GGA ATA TAT AAA TTC AGC -3'        | 5'- GCT GAA TTT ATA TAT TCC TTT GTC TTC GCT GTA TTT GGA GAG GTA GCG -3'        |
| pCOBY57 | T56A              | 5'- CCA AAT ACA CCA AAG GCA AAG GAA TAT ATA AAT TCA GC -3'                     | 5'- GCT GAA TTT ATA TAT TCC TTT GCC TTT GGT GTA TTT GG -3'                     |
| pCOBY52 | Y80F              | 5'- GTT ATA GAC ACA TCT GGT AAA GGT TTT ATA GAA GAT TTA AAT GAA TGT ATT GG -3' | 5'- CCA ATA CAT TCA TTT AAA TCT TCT ATA AAA CCT TTA CCA GAT GTG TCT ATA AC -3' |
| pCOBY53 | D83G              | 5'- CTG GTA AAG GTT ATA TAG AAG GCT TAA ATG AAT GTA TTG G -3'                  | 5'- CCA ATA CAT TCA TTT AAG CCT TCT ATA TAA CCT TTA CCA G -3'                  |

|         |                         |                                                                                                                                                                                                      |                                                                                     |
|---------|-------------------------|------------------------------------------------------------------------------------------------------------------------------------------------------------------------------------------------------|-------------------------------------------------------------------------------------|
| pCOBY45 | P94A                    | 5'- GTA TTG GAT ATT TCT CAG AAG<br>CGT TCT TAG TTG TTA GCT CTG AC -3'                                                                                                                                | 5'- GTC AGA GCT AAC AAC TAA GAA CGC<br>TTC TGA GAA ATA TCC AAT AC -3'               |
| pCOBY58 | S100A                   | 5'- CCA TTC TTA GTT GTT AGC <b>GCT</b><br>GAC TTA ATT AAC TTA AAA TCG -3'                                                                                                                            | 5'- CGA TTT TAA GTT AAT TAA GTC <b>AGC</b><br>GCT AAC AAC TAA GAA TGG -3'           |
| pCOBY49 | D101G                   | 5'- CCA TTC TTA GTT GTT AGC TCT<br><b>GGC</b> TTA ATT AAC TTA AAA TCG -3'                                                                                                                            | 5'- CGA TTT TAA GTT AAT TAA <b>GCC</b> AGA<br>GCT AAC AAC TAA GAA TGG -3'           |
| pCOBY39 | G153D                   | 5'- CGG CTT AGT TCC TGC <b>AGA</b> CAT<br>AAA TGT TGT ATC CCC -3'                                                                                                                                    | 5'- GGG GAT ACA ACA TTT ATG <b>TCT</b> GCA<br>GGA ACT AAG CCG -3'                   |
| pCOBY44 | N177R                   | 5'- GGT TAT TGA TGA GCT GAT ATT<br><b>CCG</b> CAT AAA TAC TAA AGA TG -3'                                                                                                                             | 5'- CAT CTT TAG TAT TTA <b>TGC</b> GGA ATA<br>TCA GCT CAT CAA TAA CC -3'            |
| pCOBY60 | N179D                   | 5'- GAG CTG ATA TTC AAT ATA <b>GAT</b><br>ACT AAA GAT GAT TTA AAA CTT GC -3'                                                                                                                         | 5'- GCA AGT TTT AAA TCA TCT TTA <b>GTA</b><br><b>TCT</b> ATA TTG AAT ATC AGC TC -3' |
| pCOBY59 | T180A                   | 5'- GAT GAG CTG ATA TTC AAT ATA<br>AAT <b>GCT</b> AAA GAT GAT TTA AAA CTT<br>GCT G -3'                                                                                                               | 5'- CAG CAA GTT TTA AAT CAT CTT <b>TAG</b><br>CAT TTA TAT TGA ATA TCA GCT CAT C -3' |
| pCOBY61 | L38K<br>K41D            | 5'- CTT ATA GAT TAT GTT GTC TCT CCC<br>TTA <b>AAG</b> AAA TCA <b>GAT</b> GTA AAT AAT<br>ATA TTT ATC GCT ACC TCT CC -3'                                                                               | None                                                                                |
| pCOBY62 | L38D<br>L41D            | 5'- CTT ATA GAT TAT GTT GTC TCT CCC<br>TTA <b>GAT</b> AAA TCA <b>GAT</b> GTA AAT AAT<br>ATA TTT ATC GCT ACC TCT CC -3'                                                                               | None                                                                                |
| pCOBY63 | I144D<br>F146D<br>Y163R | 5'- CA AAA GAA AAA TAT CCA AAC<br>CCC TCA <b>GAC</b> GAT <b>GAC</b> AAC GGC TTA<br>GTT CCT GCA GGG -3'<br>5'- GTT GTA TCC CCA AAG CAT GGA<br><b>CGT</b> CAA AAA GAA GAA ATT ATG GTT<br>ATT GAT G -3' | None                                                                                |

Bold type indicates the codon changed. Plasmids were constructed using method A, with the exception of plasmids pCOBY61-63, which were constructed using method B; both methods are described under Experimental Procedures.

|                |                                                                                                                                                                                                                                                                                                                                                                                                                                                                                                 |
|----------------|-------------------------------------------------------------------------------------------------------------------------------------------------------------------------------------------------------------------------------------------------------------------------------------------------------------------------------------------------------------------------------------------------------------------------------------------------------------------------------------------------|
| <i>M jann</i>  | MDALIMAGCGKGT <b>R</b> MGG- <b>VEKPL</b> LKLCGRCLIDYVVSPLLKS-KVNNIFAT <b>S</b> PN <b>TPK</b> TKEYINSAYKDYKN---IVVIDTSGK <b>Y</b> IE <b>D</b> INECTIG 90                                                                                                                                                                                                                                                                                                                                         |
| <i>M mari</i>  | MDALIMAGCGKGT <b>R</b> LKENVEK <b>P</b> ILNICEKPMIDYVIDSLNS-KIEKIYVAVS <b>I</b> HT <b>PK</b> TKEYLEKKYRLDRNYPKIDICTSGTNYVD <b>L</b> NECME 94                                                                                                                                                                                                                                                                                                                                                    |
| <i>M vann</i>  | MDVLIMAGCGMGT <b>R</b> LKKNIEK <b>P</b> LLKISGKPMIDYIMEAVLNS-NIEKIRISVSK <b>H</b> TPNTKIYIENNYINTKKYNQRVEI <b>I</b> H <b>T</b> SGIGY <b>I</b> ND <b>L</b> NECTE 94                                                                                                                                                                                                                                                                                                                              |
| <i>Ms maz</i>  | MDAIVMAGGFGQ <b>R</b> LGM-GEKPCV <b>E</b> LLGKPLITYVIDNLRASKNIDRVFVAVSPV <b>T</b> PKTE <b>I</b> MIQ-----ERYKGEVQV <b>I</b> RTFG <b>N</b> YV <b>G</b> DMIHAVE 88                                                                                                                                                                                                                                                                                                                                 |
| <i>M bark</i>  | MDAIVMAGGFGQ <b>R</b> LGM-GEKPCV <b>E</b> LLGKPLIAYVIDTLRASENIDRVFVAVSPV <b>T</b> PRTE <b>I</b> MIQ-----ERYKGEV <b>R</b> V <b>I</b> RTFG <b>N</b> YV <b>G</b> DMIHAVE 88                                                                                                                                                                                                                                                                                                                        |
| <i>M burt</i>  | MAGG <b>Q</b> GL <b>R</b> LGM-GEKPCV <b>E</b> LLGKPLISYVIDSLERSSYIERIFVAVSP <b>T</b> PA <b>T</b> EELVN-----EKYGDHIQAIY <b>T</b> NGDN <b>Y</b> V <b>G</b> DMVYAVE 83                                                                                                                                                                                                                                                                                                                             |
| <i>M therm</i> | MAGG <b>K</b> GS <b>R</b> LGM-GEK <b>P</b> MVRLYK <b>K</b> PLIDYVVSALRPS--TERII <b>V</b> AT <b>T</b> RAT <b>P</b> ET <b>R</b> RSW-----LGKNLE <b>V</b> VD <b>T</b> SG <b>S</b> GY <b>I</b> P <b>D</b> MEAVE 78                                                                                                                                                                                                                                                                                   |
| <i>M the</i>   | MNRMMALVMAGG <b>R</b> G <b>T</b> R <b>L</b> AIDCE <b>K</b> PL <b>L</b> EVAG <b>R</b> PMIDH <b>V</b> LEALE <b>S</b> AT <b>G</b> VD <b>G</b> I <b>I</b> V <b>V</b> T <b>S</b> PH <b>T</b> PM <b>T</b> ED <b>H</b> VR-----GR <b>H</b> PIFRAS <b>G</b> GGY <b>V</b> E <b>D</b> LRE <b>V</b> LS 88                                                                                                                                                                                                   |
| <i>M stad</i>  | MTTALIMAGG <b>K</b> G <b>T</b> R <b>L</b> DD <b>Y</b> E <b>K</b> PMV <b>K</b> VNT <b>K</b> PMISY <b>V</b> IEALS <b>F</b> STYID <b>K</b> ILVAV <b>S</b> PN <b>T</b> PC <b>T</b> AD <b>Y</b> V <b>K</b> -----K---Y <b>P</b> VI <b>V</b> V <b>K</b> T <b>K</b> LG <b>Y</b> IE <b>D</b> LS <b>D</b> ILS 87                                                                                                                                                                                          |
| <i>M hung</i>  | MFALIMAGGRAS <b>R</b> LGM-GE <b>K</b> AL <b>T</b> RI <b>H</b> DK <b>P</b> LL <b>S</b> F <b>V</b> LN <b>A</b> VE <b>M</b> A--E <b>L</b> EP <b>V</b> IV <b>S</b> PI <b>T</b> PY <b>T</b> NY <b>C</b> R-----M <b>H</b> D <b>I</b> P <b>W</b> I <b>C</b> T <b>D</b> CK <b>G</b> Y <b>V</b> Q <b>D</b> I <b>C</b> Q <b>A</b> V <b>G</b> 83                                                                                                                                                           |
| <i>A fulg</i>  | MLTLLM <b>C</b> G <b>K</b> G <b>T</b> R <b>L</b> G <b>R</b> -GE <b>K</b> PL <b>F</b> EV <b>C</b> GM <b>L</b> ID <b>H</b> S <b>L</b> L <b>Q</b> Y <b>K</b> D <b>F</b> ----D <b>V</b> I <b>A</b> I <b>T</b> S <b>P</b> H <b>T</b> PA <b>T</b> ES <b>Y</b> LA-----E---K <b>G</b> VE <b>V</b> Y <b>R</b> A <b>A</b> G <b>K</b> Y <b>I</b> E <b>D</b> Y <b>S</b> E <b>A</b> C <b>R</b> 81                                                                                                            |
| <i>T koda</i>  | MI <b>I</b> IL <b>A</b> G <b>K</b> S <b>T</b> R <b>M</b> G <b>K</b> -- <b>E</b> K <b>P</b> V <b>L</b> K <b>I</b> A <b>G</b> E <b>M</b> LL <b>W</b> Y <b>A</b> S <b>A</b> S <b>R</b> V---D <b>E</b> T <b>I</b> V <b>A</b> L <b>S</b> K <b>N</b> T <b>P</b> K <b>T</b> R <b>E</b> L <b>C</b> L <b>R</b> -----E <b>G</b> I <b>P</b> F <b>M</b> E <b>T</b> P <b>K</b> Y <b>G</b> Y <b>V</b> E <b>D</b> W <b>Q</b> W <b>L</b> L <b>N</b> 80                                                          |
| <i>M jann</i>  | Y-----F <b>S</b> E <b>P</b> FL <b>V</b> V <b>S</b> <b>S</b> <b>D</b> LINL <b>K</b> SK <b>I</b> INS <b>I</b> V <b>D</b> Y <b>F</b> Y <b>C</b> IK <b>A</b> K <b>T</b> P <b>D</b> VEAL <b>A</b> VM <b>I</b> PK <b>E</b> K <b>Y</b> P-N <b>S</b> I <b>D</b> F <b>N</b> C-L-V <b>P</b> A <b>C</b> IN <b>V</b> V <b>S</b> P <b>K</b> --H <b>G</b> Y <b>O</b> K <b>E</b> E <b>I</b> M <b>V</b> I <b>D</b> --E <b>L</b> I 176                                                                           |
| <i>M mari</i>  | F-----F <b>K</b> EP <b>F</b> L <b>I</b> L <b>S</b> S <b>D</b> I <b>P</b> T <b>I</b> K <b>P</b> K <b>V</b> INS <b>I</b> I <b>Q</b> Y <b>L</b> F <b>V</b> NN <b>S</b> C <b>N</b> R <b>I</b> ES <b>F</b> CV <b>V</b> T <b>K</b> DD <b>D</b> Y <b>V</b> G <b>T</b> PS <b>I</b> N <b>M</b> G <b>C</b> --Y <b>I</b> PL <b>C</b> IN <b>I</b> L <b>T</b> P <b>K</b> --H <b>G</b> E <b>O</b> T <b>E</b> I <b>L</b> H <b>V</b> I <b>K</b> --D <b>I</b> I 181                                              |
| <i>M vann</i>  | Y-----F <b>K</b> EP <b>F</b> L <b>I</b> L <b>T</b> S <b>D</b> I <b>P</b> T <b>I</b> K <b>S</b> K <b>T</b> INS <b>I</b> INE <b>Y</b> L <b>I</b> IN <b>S</b> NN <b>P</b> IES <b>L</b> CA <b>V</b> T <b>L</b> K <b>E</b> NY <b>I</b> G <b>T</b> P <b>T</b> I <b>D</b> I <b>K</b> G--Y <b>I</b> PL <b>C</b> IN <b>I</b> L <b>S</b> P <b>K</b> --Y <b>G</b> E <b>O</b> T <b>E</b> M <b>L</b> Y <b>L</b> I <b>D</b> --E <b>K</b> I 181                                                                |
| <i>Ms maz</i>  | TSN---TAG <b>P</b> V <b>M</b> I <b>I</b> MS <b>D</b> L <b>P</b> L <b>V</b> NP <b>D</b> L <b>I</b> DS <b>V</b> IE <b>K</b> Y <b>R</b> E <b>E</b> G <b>K</b> P <b>A</b> LS <b>V</b> Y <b>V</b> IN <b>V</b> CR <b>G</b> T <b>G</b> IR <b>P</b> D <b>T</b> V <b>F</b> N <b>K</b> D <b>G</b> K <b>L</b> I <b>V</b> P <b>A</b> C <b>I</b> N <b>I</b> L <b>D</b> S <b>S</b> Q <b>I</b> R <b>K</b> E <b>O</b> E <b>D</b> F <b>N</b> L <b>I</b> L <b>D</b> N <b>P</b> R <b>L</b> A 182                   |
| <i>M bark</i>  | TAE---TV <b>G</b> P <b>V</b> M <b>I</b> IMS <b>D</b> L <b>P</b> L <b>I</b> NS <b>E</b> L <b>I</b> DS <b>V</b> IE <b>K</b> Y <b>K</b> E <b>E</b> G <b>K</b> P <b>A</b> LS <b>V</b> Y <b>V</b> IN <b>V</b> CK <b>G</b> A <b>G</b> IR <b>P</b> D <b>T</b> V <b>F</b> N <b>K</b> D <b>G</b> K <b>L</b> I <b>V</b> P <b>A</b> C <b>I</b> N <b>I</b> L <b>D</b> S <b>S</b> Q <b>I</b> R <b>K</b> E <b>O</b> E <b>D</b> F <b>N</b> L <b>I</b> L <b>D</b> N <b>P</b> K <b>L</b> A 182                   |
| <i>M burt</i>  | SSN---IQ <b>E</b> P <b>V</b> M <b>I</b> IMS <b>D</b> L <b>P</b> M <b>V</b> T <b>P</b> K <b>L</b> I <b>D</b> S <b>I</b> IE <b>A</b> Y <b>R</b> D <b>C</b> G <b>S</b> S <b>S</b> M <b>S</b> V <b>F</b> V <b>I</b> SL <b>C</b> K <b>K</b> V <b>G</b> IR <b>P</b> D <b>T</b> V <b>F</b> N <b>W</b> K <b>N</b> L <b>I</b> V <b>P</b> A <b>C</b> I <b>N</b> I <b>L</b> D <b>G</b> K <b>F</b> IN <b>E</b> E <b>O</b> E <b>Y</b> H <b>N</b> Y <b>I</b> L <b>D</b> D <b>P</b> E <b>V</b> A 178           |
| <i>M therm</i> | RAG---IS <b>G</b> P <b>V</b> M <b>V</b> IM <b>A</b> D <b>L</b> PL <b>I</b> TE <b>E</b> I <b>V</b> RE <b>V</b> ID <b>A</b> Y <b>K</b> S <b>R</b> PE <b>P</b> A <b>L</b> S <b>V</b> H <b>T</b> LL <b>S</b> L <b>H</b> R <b>S</b> L <b>G</b> R <b>R</b> P <b>D</b> V <b>I</b> F <b>N</b> Y <b>M</b> G <b>E</b> L <b>I</b> V <b>P</b> A <b>C</b> I <b>N</b> I <b>L</b> T <b>G</b> S <b>R</b> I <b>S</b> D <b>E</b> O <b>E</b> D <b>F</b> H <b>L</b> I <b>M</b> N <b>R</b> I <b>E</b> L <b>A</b> 173 |
| <i>M the</i>   | HLEES-Y <b>H</b> E <b>P</b> LL <b>V</b> INS <b>D</b> L <b>P</b> L <b>V</b> R <b>P</b> ST <b>I</b> D <b>W</b> I <b>S</b> S <b>Y</b> H <b>S</b> C <b>E</b> P <b>A</b> M <b>C</b> V <b>A</b> V <b>P</b> DD <b>L</b> C <b>R</b> R <b>H</b> L <b>L</b> --D <b>F</b> S <b>G</b> S <b>L</b> D <b>G</b> -L-V <b>P</b> C <b>G</b> V <b>N</b> I <b>L</b> M <b>S</b> K--N <b>R</b> V <b>O</b> E <b>Q</b> R <b>I</b> E <b>A</b> S <b>M</b> L <b>E</b> L <b>A</b> 179                                        |
| <i>M stad</i>  | NRKY <b>V</b> D <b>E</b> D <b>E</b> V <b>M</b> T <b>I</b> V <b>S</b> D <b>L</b> P <b>F</b> I <b>T</b> S <b>T</b> Q <b>I</b> DD <b>V</b> L <b>D</b> N <b>Y</b> ER <b>K</b> K <b>P</b> A <b>M</b> C <b>V</b> S <b>V</b> P <b>A</b> Y <b>L</b> F <b>E</b> K <b>Y</b> G <b>I</b> --T <b>P</b> T <b>M</b> V <b>Y</b> E <b>G</b> -L-V <b>P</b> T <b>C</b> V <b>N</b> L <b>L</b> L <b>A</b> N--N <b>K</b> E <b>O</b> D <b>T</b> I <b>Y</b> V <b>S</b> K <b>N</b> I <b>E</b> L <b>A</b> 179             |
| <i>M hung</i>  | ELS---IS <b>G</b> P <b>F</b> L <b>T</b> I <b>C</b> A <b>D</b> L <b>P</b> G <b>I</b> T <b>A</b> D <b>H</b> I <b>R</b> K <b>I</b> IE <b>Q</b> F <b>H</b> E <b>S</b> G <b>R</b> P <b>A</b> C <b>S</b> V <b>W</b> A <b>D</b> --P <b>K</b> K-----T <b>S</b> S <b>D</b> T <b>F</b> P <b>G</b> ---I <b>P</b> V <b>G</b> M <b>N</b> I <b>L</b> T <b>G</b> S <b>M</b> I <b>D</b> R <b>E</b> O <b>E</b> I <b>Q</b> I <b>I</b> I <b>P</b> D <b>P</b> L <b>T</b> 168                                        |
| <i>A fulg</i>  | ELA---IN <b>E</b> P <b>V</b> I <b>V</b> A <b>S</b> A <b>D</b> I <b>V</b> Y <b>I</b> R-D <b>I</b> A <b>F</b> D <b>I</b> V <b>A</b> Y <b>M</b> K <b>T</b> I <b>K</b> P <b>A</b> L-----T-----V <b>V</b> M <b>E</b> G---E <b>P</b> V <b>G</b> V <b>N</b> I <b>I</b> D <b>S</b> L <b>L</b> I <b>N</b> T <b>W</b> Q <b>E</b> E <b>I</b> Y <b>S</b> T <b>E</b> K-D <b>S</b> V 153                                                                                                                      |
| <i>T koda</i>  | E <b>F</b> G-----P <b>F</b> I <b>S</b> S <b>S</b> D <b>I</b> P <b>F</b> V <b>K</b> P <b>S</b> D <b>F</b> Y <b>A</b> V <b>K</b> K <b>A</b> F <b>N</b> --G <b>K</b> T <b>S</b> L <b>T</b> G <b>V</b> L <b>P</b> I <b>Q</b> K <b>V</b> P <b>K</b> D----L <b>K</b> P <b>L</b> Y <b>R</b> G--Y <b>A</b> I <b>V</b> L <b>N</b> A <b>V</b> G <b>F</b> E-----G <b>E</b> G <b>F</b> F <b>E</b> L <b>E</b> N <b>P</b> L <b>L</b> A 158                                                                    |
| <i>M jann</i>  | <b>F</b> N <b>I</b> N <b>T</b> K <b>D</b> L <b>K</b> L <b>A</b> E <b>M</b> L <b>L</b> K <b>K</b> ---D <b>G</b> L 197                                                                                                                                                                                                                                                                                                                                                                            |
| <i>M mari</i>  | V <b>N</b> V <b>N</b> T <b>L</b> S <b>D</b> K <b>K</b> L <b>V</b> E <b>T</b> L <b>I</b> N <b>K</b> ---V <b>V</b> E 201                                                                                                                                                                                                                                                                                                                                                                          |
| <i>M vann</i>  | V <b>N</b> V <b>N</b> T <b>L</b> I <b>D</b> K <b>N</b> L <b>V</b> E <b>N</b> I <b>L</b> K <b>K</b> ---G <b>D</b> 201                                                                                                                                                                                                                                                                                                                                                                            |
| <i>Ms maz</i>  | I <b>N</b> V <b>N</b> T <b>V</b> K <b>D</b> L <b>Q</b> R <b>C</b> K <b>D</b> L <b>L</b> Q <b>C</b> ---S <b>N</b> 203                                                                                                                                                                                                                                                                                                                                                                            |
| <i>M bark</i>  | I <b>N</b> V <b>N</b> T <b>V</b> E <b>D</b> L <b>Q</b> H <b>C</b> E <b>M</b> L <b>Q</b> G---Q <b>D</b> 203                                                                                                                                                                                                                                                                                                                                                                                      |
| <i>M burt</i>  | I <b>N</b> I <b>N</b> T <b>V</b> D <b>D</b> M <b>K</b> Q <b>C</b> E <b>D</b> L <b>L</b> M <b>K</b> N <b>L</b> F <b>S</b> N 201                                                                                                                                                                                                                                                                                                                                                                  |
| <i>M therm</i> | I <b>N</b> I <b>N</b> T <b>P</b> D <b>L</b> R <b>I</b> C <b>E</b> R <b>I</b> T <b>K</b> R <b>R</b> M <b>E</b> S <b>Q</b> G <b>D</b> M <b>D</b> 200                                                                                                                                                                                                                                                                                                                                              |
| <i>M the</i>   | V <b>N</b> I <b>N</b> S <b>C</b> R <b>D</b> L <b>K</b> V <b>L</b> E <b>K</b> I <b>L</b> G <b>E</b> I <b>D</b> G <b>R</b> E <b>E</b> A <b>H</b> K <b>R</b> G <b>R</b> E <b>V</b> L <b>E</b> 213                                                                                                                                                                                                                                                                                                  |
| <i>M stad</i>  | <b>F</b> N <b>I</b> N <b>T</b> L <b>D</b> L <b>D</b> L <b>S</b> E <b>H</b> Y <b>T</b> K <b>R</b> W 199                                                                                                                                                                                                                                                                                                                                                                                          |
| <i>M hung</i>  | I <b>N</b> I <b>N</b> T <b>P</b> E <b>D</b> L <b>K</b> T <b>A</b> E <b>I</b> M <b>L</b> K <b>R</b> M <b>K</b> S <b>S</b> D <b>V</b> Q <b>P</b> T <b>L</b> L 197                                                                                                                                                                                                                                                                                                                                 |
| <i>A fulg</i>  | V <b>N</b> V <b>N</b> T <b>V</b> A <b>D</b> V <b>E</b> R <b>A</b> E <b>R</b> L <b>W</b> T <b>M</b> R <b>K</b> E <b>R</b> G <b>W</b> Q <b>R</b> D 181                                                                                                                                                                                                                                                                                                                                            |
| <i>T koda</i>  | I <b>N</b> V <b>N</b> T <b>P</b> E <b>D</b> L <b>K</b> L <b>A</b> E <b>R</b> I <b>A</b> R <b>L</b> V <b>R</b> K <b>V</b> I <b>F</b> G <b>W</b> E <b>D</b> L <b>T</b> T <b>G</b> R 191                                                                                                                                                                                                                                                                                                           |

**Figure S1. Alignment of putative CobY proteins.** Conserved residues are outlined in black; conservative changes are shown in gray. *M jann*, *Methanocaldococcus jannaschii* DSM 2661; *M mari*, *Methanococcus maripaludis* S2; *M vann*, *Methanococcus vannielii* SB; *Ms maz*, *Methanosarcina mazei* Gö1; *M bark*, *Methanosarcina barkeri* str. *fusaro*; *M burt*, *Methanococcoides burtonii* DSM 6242; *M therm*, *Methanothermobacter thermautotrophicus* str.  $\Delta$ H; *M the*, *Methanosaeta thermophila* PT; *M stad*, *Methanosphaera stadtmanae* DSM 3091; *M hung*, *Methanospirillum hungatei* JF-1; *A fulg*, *Archaeoglobus fulgidus* DSM 4304; *T koda*, *Thermococcus kodakarensis* KOD1. Site-directed substitutions were made at the conserved residues highlighted in blue; conserved residues highlighted in red inactivated the enzyme.

## REFERENCES

- Otte, M. M., Woodson, J. D., and Escalante-Semerena, J. C. (2007) The thiamine kinase (YcfN) enzyme plays a minor but significant role in cobinamide salvaging in *Salmonella enterica*, *J. Bacteriol.* 189, 7310-7315.
- Otte, M. M., and Escalante-Semerena, J. C. (2009) Biochemical characterization of the GTP:adenosylcobinamide-phosphate guanylyltransferase (CobY) enzyme of the hyperthermophilic archaeon *Methanocaldococcus jannaschii*, *Biochemistry* 48, 5882-5889.
- Otte, M. M., and Escalante-Semerena, J. C. (2009) Biochemical characterization of the GTP:adenosylcobinamide-phosphate guanylyltransferase (CobY) enzyme of the hyperthermophilic archaeon *Methanocaldococcus jannaschii*, *Biochemistry* 48, 5882-5889.

4. Tabor, S., and Richardson, C. C. (1985) A bacteriophage T7 RNA polymerase/promoter system for controlled exclusive expression of specific genes, *Proc. Natl. Acad. Sci. U.S.A.* 82, 1074-1078.
5. Grochowski, L. L., Xu, H., and White, R. H. (2008) Identification and characterization of the 2-phospho-L-lactate guanylyltransferase involved in coenzyme F420 biosynthesis, *Biochemistry* 47, 3033-3037.
6. Matthews, R. G. (2001) Cobalamin-dependent methyltransferases, *Acc. Chem. Res.* 34, 681-689.
